# Supplementary material for: Potent transmission-blocking monoclonal antibodies from naturally exposed individuals target a conserved epitope on Plasmodium falciparum Pfs230
Source: PubMed Central journal article supplement (PMC9942874; doi:10.1016/j.immuni.2023.01.013), 2023-02-14
Supplement: mmc1.pdf [file mmc1.pdf]

**Supplemental information**

**Potent transmission-blocking monoclonal antibodies  
from naturally exposed individuals target a  
conserved epitope on *Plasmodium falciparum* Pfs230**

**Danton Ivanochko, Amanda Fabra-García, Karina Teelen, Marga van de Vegte-Bolmer, Geert-Jan van Gemert, Jocelyn Newton, Anthony Semesi, Marloes de Bruijini, Judith Bolscher, Jordache Ramjith, Marta Szabat, Stefanie Vogt, Lucas Kraft, Sherie Duncan, Shwu-Maan Lee, Moses R. Kanya, Margaret E. Feeney, Prasanna Jagannathan, Bryan Greenhouse, Robert W. Sauerwein, C. Richter King, Randall S. MacGill, Teun Bousema, Matthijs M. Jore, and Jean-Philippe Julien**

# Supplementary Figures and Tables

Potent transmission-blocking monoclonal antibodies from naturally exposed individuals target a conserved epitope on *Plasmodium falciparum* Pfs230

Danton Ivanochko<sup>1\*</sup>, Amanda Fabra-García<sup>2\*</sup>, Karina Teelen<sup>2</sup>, Marga van de Vegte-Bolmer<sup>2</sup>, Geert-Jan van Gemert<sup>2</sup>, Jocelyn Newton<sup>1</sup>, Anthony Semesi<sup>1</sup>, Marloes de Bruijini<sup>3</sup>, Judith Bolscher<sup>3</sup>, Jordache Ramjith<sup>4</sup>, Marta Szabat<sup>5</sup>, Stefanie Vogt<sup>5</sup>, Lucas Kraft<sup>5</sup>, Sherie Duncan<sup>5</sup>, Shwu-Maan Lee<sup>6</sup>, Moses R Kanya<sup>7</sup>, Margaret E Feeney<sup>8,9</sup>, Prasanna Jagannathan<sup>10</sup>, Bryan Greenhouse<sup>8</sup>, Robert W Sauerwein<sup>3</sup>, C Richter King<sup>6</sup>, Randall S MacGill<sup>6</sup>, Teun Bousema<sup>2,#</sup>, Matthijs M Jore<sup>2,#</sup>, Jean-Philippe Julien<sup>1,11,#</sup>

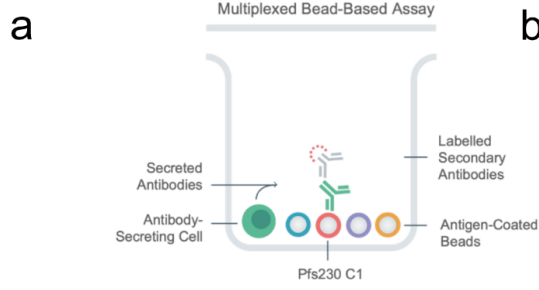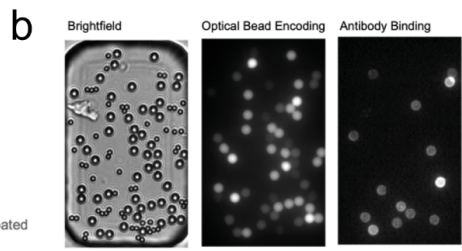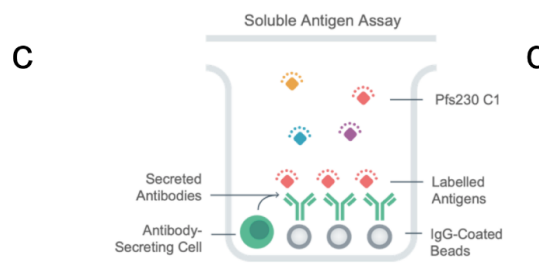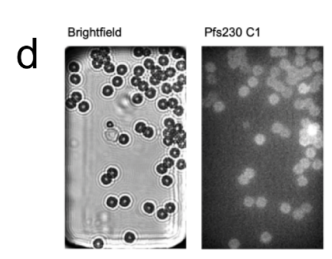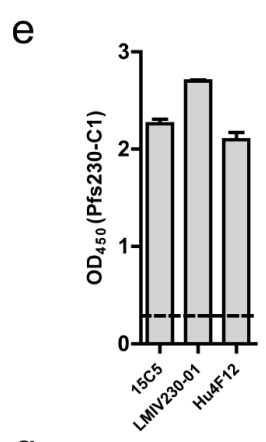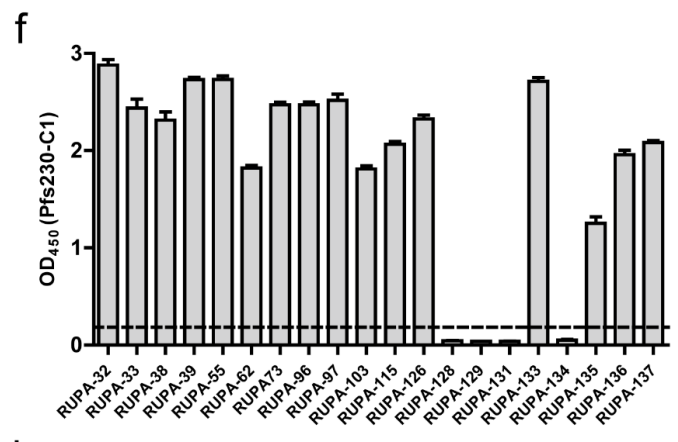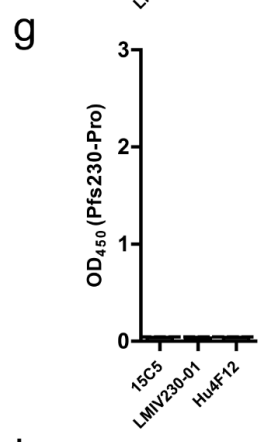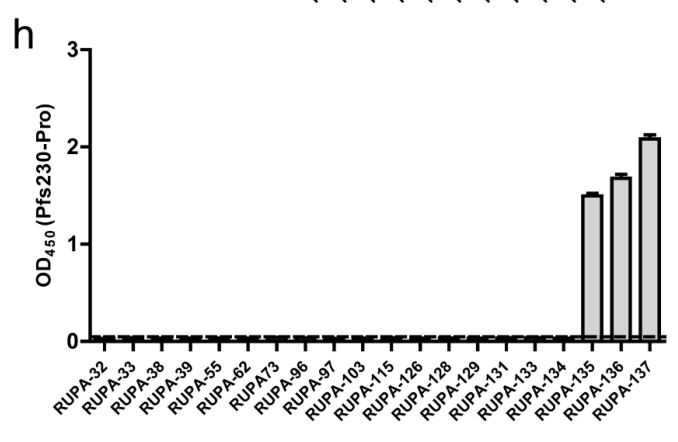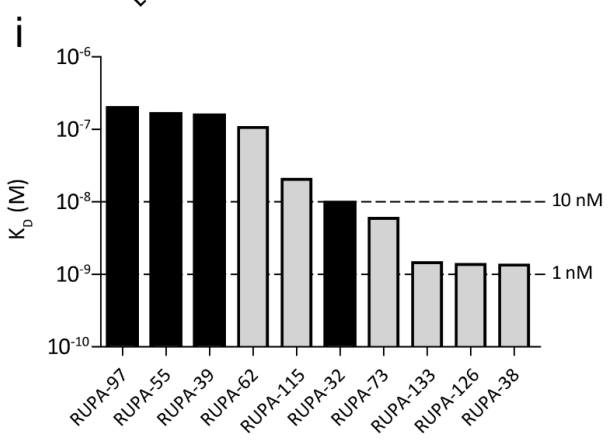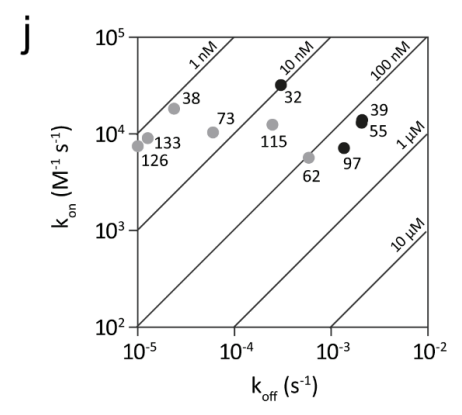

**Fig S1. Single B cell screening assays, domain-specificity of identified mAbs, and affinities of mAbs for Pfs230-C1.** Related to **Fig 1** and **Fig 2**. **(a, c)** Representations of the multiplexed bead-based and soluble antigen assays used during primary screening. **(b, d)** Representative microscopic screening images of antibodies assessed for specificity to Pfs230 C1 in each assay. Enzyme-linked immunosorbent assays were performed with Pfs230-C1 and Pfs230-Pro constructs to determine domain specificity. Previously identified mAbs against Domain I recognized Pfs230-C1 **(e)**, but not Pfs230-Pro **(g)**. 16 of the 20 identified mAbs bound to Pfs230-C1 **(f)**. Three of these antibodies also react with Pfs230-Pro **(h)**. All mAbs were tested at 10  $\mu\text{g}/\text{mL}$ . Values are means of three technical replicates and error bars show s.e.m. Dashed lines represent the mean signal + three standard deviations of eight non-Pfs230 mAbs and were used as cutoff to determine positivity. **(i)** Affinity and **(j)** binding kinetics were determined using surface plasmon resonance with immobilized antibodies and antigen as analyte. Black bars and dots represent mAbs with high transmission reducing activity.  $K_D$ , binding affinity;  $k_{on}$ , association constant;  $k_{off}$ , dissociation constant.

**a**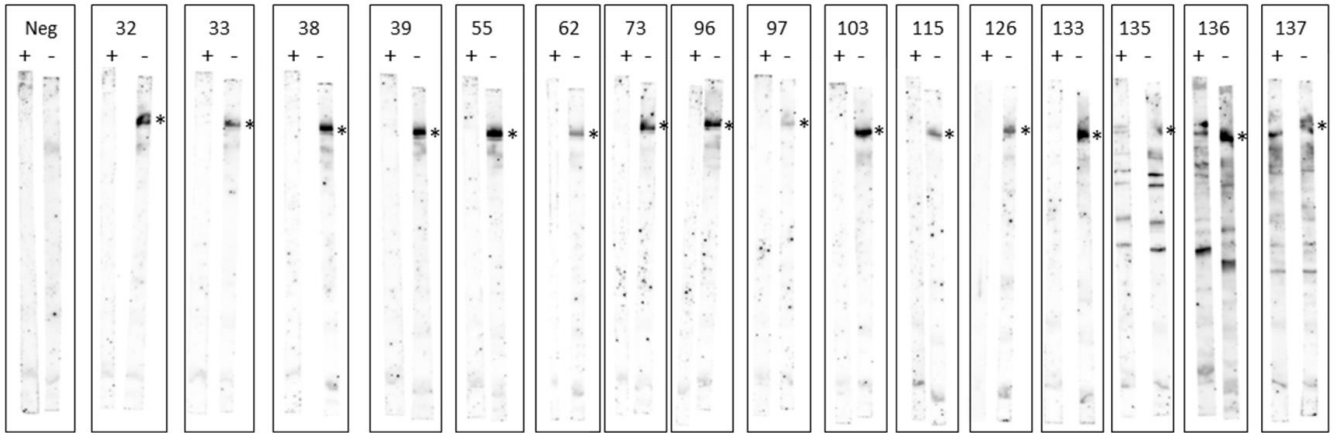**b**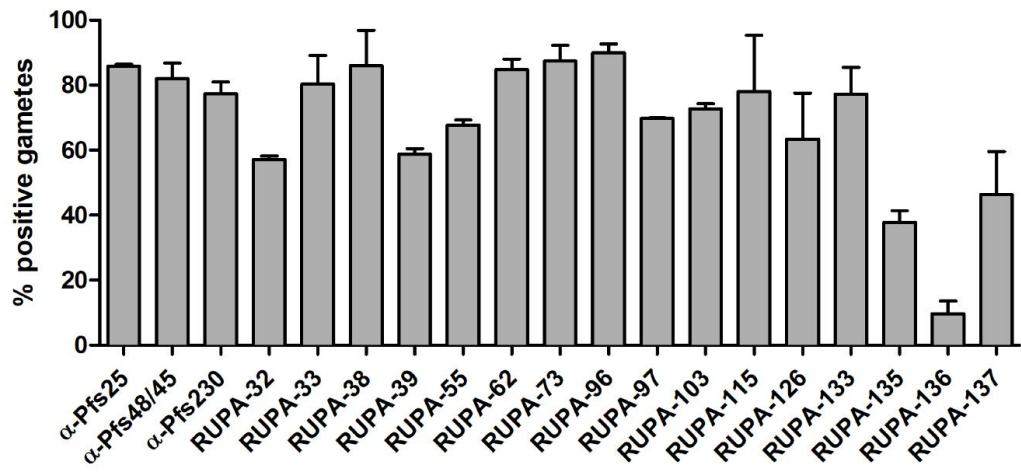**c**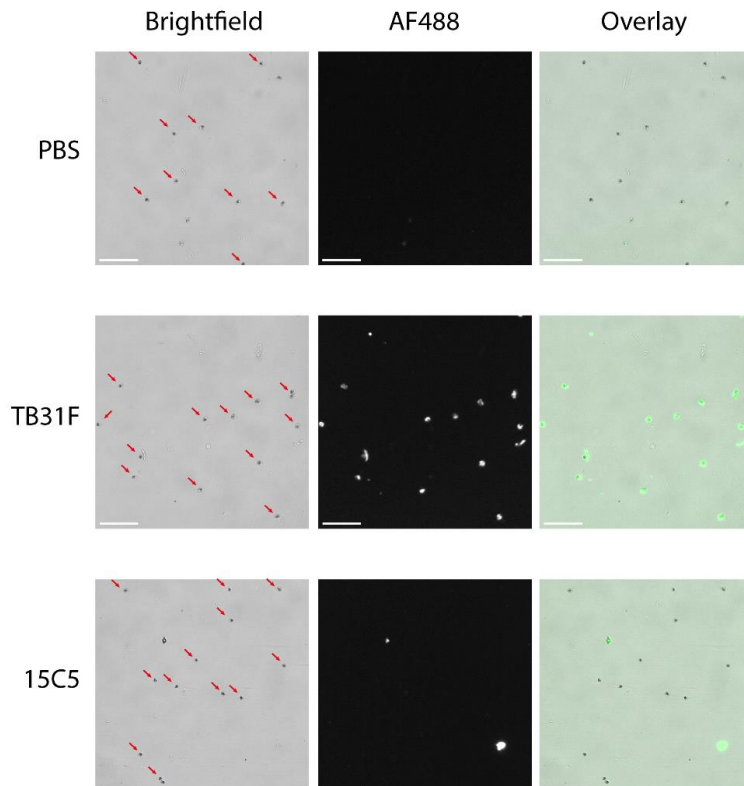

**Fig S2. Antibody recognition of native Pfs230 by Western blot and surface immunofluorescence assay.** Related to **Fig 1**. **(a)** Gametocyte extract was separated on an SDS-PAGE gel under reducing (+) and non-reducing (-) conditions and transferred to a nitrocellulose membrane. Membrane strips were then incubated with different mAbs. Pfs230 band is indicated by asterisks. Neg: non-targeting mAb. **(b)** For SIFAs, all antibodies were tested at 5 µg/mL, except for mAbs against Pfs25 (2544, 1 µg/mL), Pfs48/45 (TB31F, 0.1 µg/mL) and Pfs230 (Hu2A2, 1 µg/mL). Anti-PfCSP mAb 399, which is sporozoite specific and does not recognize female gametes, was used for background correction. Values represent means of two technical replicates after background correction, and error bars show s.d. **(c)** For the micrograph showing that 15C5 does not react with female gametes in surface immunofluorescence assay, TB31F and PBS were included as a positive and negative control respectively. Both TB31F and 15C5 were tested at 3.2 µg/mL. Bound human antibody was detected with anti-human IgG-AF488. Gametes in brightfield channel are indicated with red arrows. Scale bar represents 50 micrometers.

**Table S3. X-ray crystallography data collection and refinement statistics.**  
(Related to Fig 3 and Fig 4.

|                                              | Pfs230D1+ and Fab RUPA-32     | Pfs230D1+ and Fab RUPA-38     | Pfs230D1+ and Fab RUPA-55     | Pfs230D1+, Fab RUPA-97, and Fab 15C5 | Pfs230D1+ and Fab LMIV230-02  |
|----------------------------------------------|-------------------------------|-------------------------------|-------------------------------|--------------------------------------|-------------------------------|
| <b>PDB ID</b>                                | 7UVH                          | 7UVO                          | 7UVI                          | 7UVQ                                 | 7UVS                          |
| <b>Beamline</b>                              | APS 23-ID-D                   | APS 23-ID-B                   | APS 23-ID-B                   | APS 23-ID-D                          | APS 23-ID-B                   |
| <b>Wavelength (Å)</b>                        | 1.033190                      | 1.033192                      | 1.033167                      | 1.033190                             | 1.033167                      |
| <b>Space group</b>                           | C2                            | C2                            | I222                          | P <sub>6</sub>                       | C2                            |
| <b>Cell dimensions</b>                       |                               |                               |                               |                                      |                               |
| <b>a,b,c (Å)</b>                             | 154.87, 80.47, 124.96         | 163.71, 42.85, 95.30          | 91.02, 100.78, 425.75         | 155.00, 155.00, 92.90                | 92.36, 132.47, 125.07         |
| <b>α, β, γ (°)</b>                           | 90.0, 111.8, 90.0             | 90.0, 102.4, 90.0             | 90.0, 90.0, 90.0              | 90.0, 90.0, 120.0                    | 90.0, 102.3, 90.0             |
| <b>Resolution (Å)</b>                        | 29.43 - 2.59<br>(2.68 - 2.59) | 29.06 - 2.09<br>(2.16 - 2.09) | 29.67 - 2.92<br>(3.02 - 2.92) | 29.76 - 3.29<br>(3.41 - 3.29)        | 29.85 - 2.03<br>(2.10 - 2.03) |
| <b>Total reflections</b>                     | 540,791 (54,145)              | 465,926 (34,888)              | 1,157,261<br>(118,833)        | 324,685 (32,881)                     | 651,789 (52,806)              |
| <b>Unique reflections</b>                    | 44,578 (4413)                 | 38,739 (3849)                 | 43,033 (4247)                 | 19,432 (1925)                        | 93,278 (8599)                 |
| <b>Multiplicity</b>                          | 12.1 (12.3)                   | 12.0 (9.1)                    | 26.9 (28.0)                   | 16.7 (17.1)                          | 7.0 (6.1)                     |
| <b>R<sub>meas</sub></b>                      | 0.222 (2.156)                 | 0.219 (1.630)                 | 0.277 (3.627)                 | 0.150 (2.009)                        | 0.124 (1.160)                 |
| <b>R<sub>pim</sub></b>                       | 0.064 (0.615)                 | 0.062 (0.526)                 | 0.054 (0.679)                 | 0.036 (0.481)                        | 0.046 (0.458)                 |
| <b>&lt;I/σ I&gt;</b>                         | 9.5 (1.6)                     | 7.7 (1.6)                     | 11.5 (1.7)                    | 14.7 (1.7)                           | 11.1 (1.6)                    |
| <b>CC<sub>1/2</sub></b>                      | 0.995 (0.696)                 | 0.995 (0.622)                 | 0.998 (0.786)                 | 0.999 (0.648)                        | 0.998 (0.667)                 |
| <b>Completeness (%)</b>                      | 100 (100)                     | 99.8 (99.4)                   | 99.8 (99.8)                   | 100 (100)                            | 98.6 (90.6)                   |
| <b>Refinement Statistics</b>                 |                               |                               |                               |                                      |                               |
| <b>R<sub>work</sub>/R<sub>free</sub> (%)</b> | 19.6/23.3                     | 21.7/23.5                     | 21.8/23.7                     | 21.5/26.3                            | 17.4/21.5                     |
| <b>Reflections for R<sub>free</sub></b>      | 1999                          | 1937                          | 2233                          | 987                                  | 2019                          |
| <b>Molecules in ASU</b>                      | 2                             | 1                             | 2                             | 1                                    | 2                             |
| <b>Non-H atoms</b>                           | 9382                          | 4861                          | 9476                          | 8062                                 | 10,235                        |
| <b>Macromolecule</b>                         | 9254                          | 4743                          | 9476                          | 8062                                 | 9521                          |
| <b>Water</b>                                 | 88                            | 142                           | 0                             | 0                                    | 713                           |
| <b>Heteroatom</b>                            | 40                            | 6                             | 0                             | 0                                    | 1                             |
| <b>RMSD bonds (Å)</b>                        | 0.011                         | 0.0068                        | 0.0042                        | 0.014                                | 0.0079                        |
| <b>RMSD angles (°)</b>                       | 1.39                          | 1.01                          | 0.94                          | 1.64                                 | 1.05                          |
| <b>Ramachandran statistics</b>               |                               |                               |                               |                                      |                               |
| <b>Favored (%)</b>                           | 97.9                          | 95.9                          | 95.8                          | 96.4                                 | 97.7                          |
| <b>Allowed (%)</b>                           | 2.1                           | 4.1                           | 4.2                           | 3.6                                  | 2.3                           |
| <b>Outliers (%)</b>                          | 0                             | 0                             | 0                             | 0                                    | 0                             |
| <b>B-factors (Å<sup>2</sup>)</b>             |                               |                               |                               |                                      |                               |
| <b>Wilson B-value</b>                        | 57.4                          | 36.7                          | 75.7                          | 121.8                                | 31.6                          |
| <b>Average B-factors</b>                     | 77.6                          | 64.1                          | 106.5                         | 150.7                                | 49.3                          |
| <b>Average macromolecule</b>                 | 77.7                          | 64.9                          | 106.5                         | 150.7                                | 49.6                          |
| <b>Average water molecule</b>                | 62.0                          | 40.3                          | -                             | -                                    | 45.5                          |
| <b>Average heteroatom</b>                    | 80.8                          | 29.1                          | -                             | -                                    | 52.2                          |

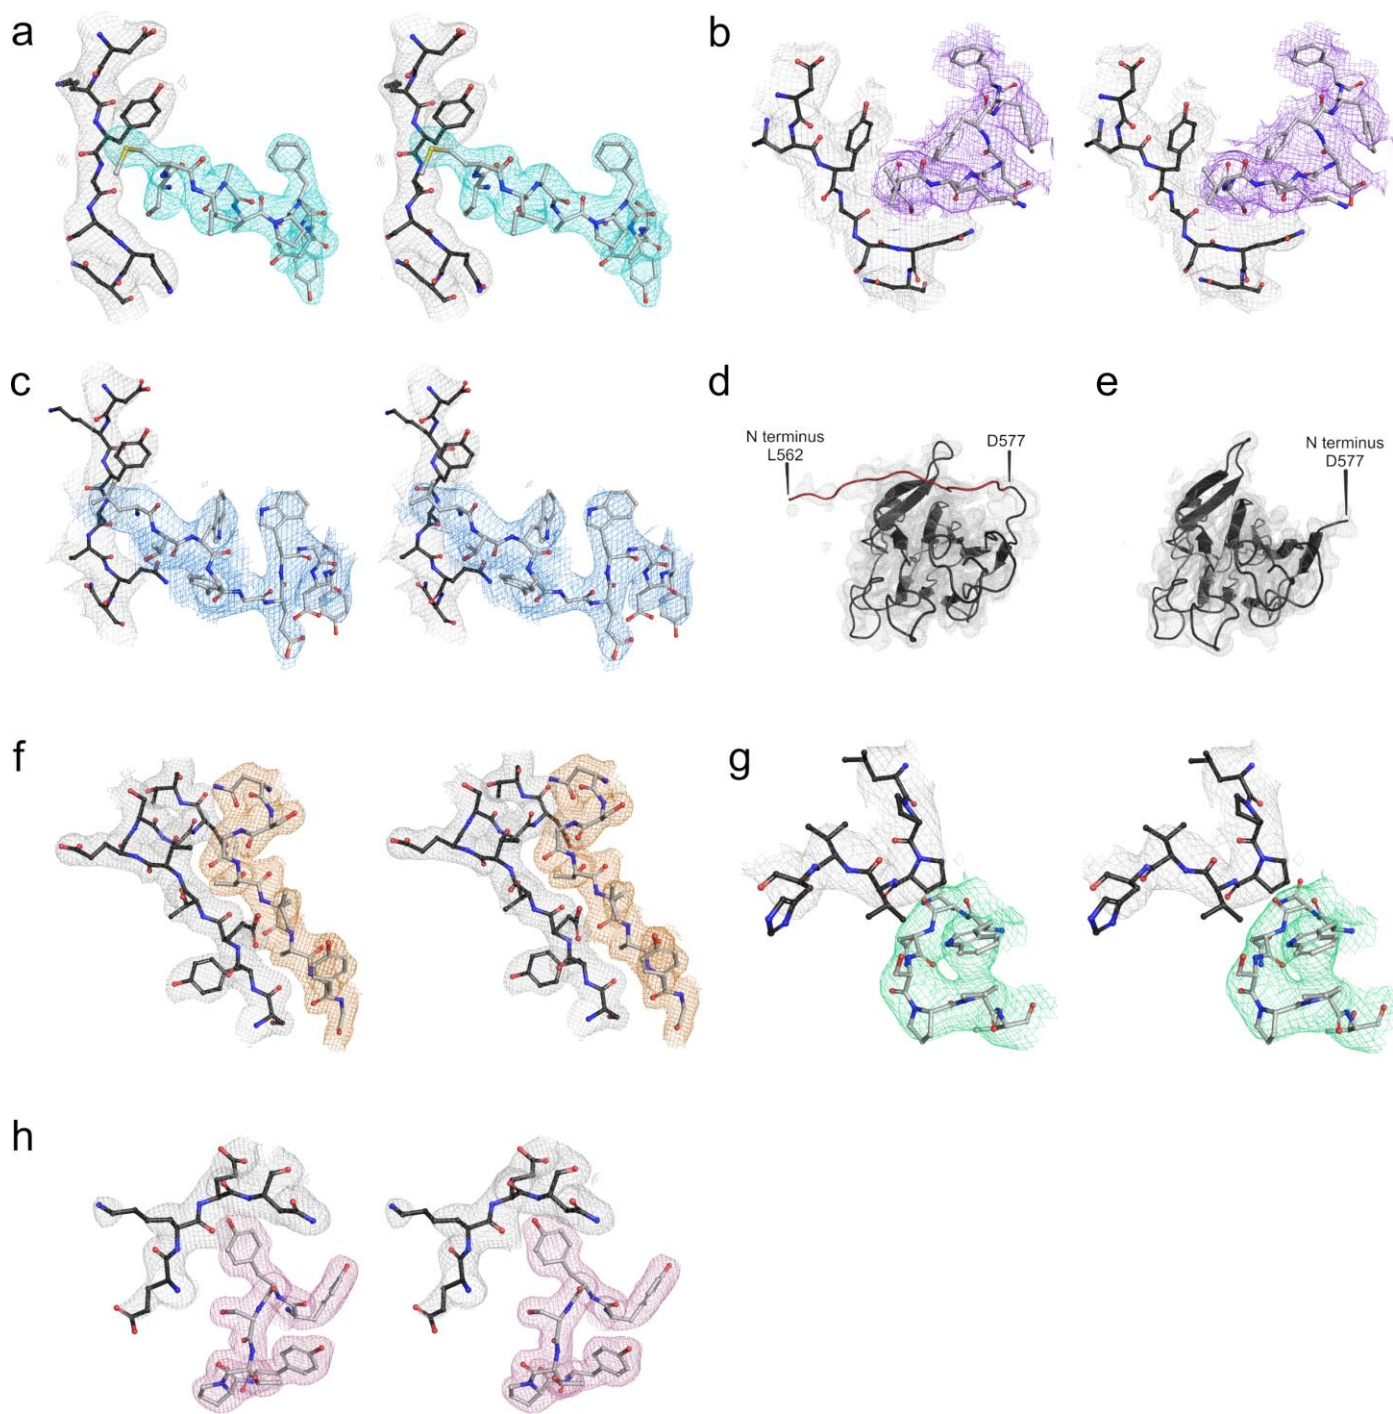

**Fig S3. Experimental details of Fab-antigen interactions and Pfs230 D1 structures.** Related to **Fig 3** and **Fig 4**. Stereo images of representative composite omit maps depicting electron density contoured at 1.0 sigma around Pfs230 D1+ bound by high potency Fabs (a) RUPA -32, (b) RUPA-55, and (c) RUPA-97, coloured in cyan, purple, and blue, respectively. Composite omit maps depicting electron density contoured at 1.0 sigma around the two biological assemblies of Pfs230 D1+ from the Fab RUPA-55 bound structure observed in (d) chain C and (e) chain F. The unique residue sequence (amino acids 562 to 576) is highlighted in red. Stereo images of representative composite omit maps depicting electron density contoured at 1.0 sigma around Pfs230 D1+ bound by low potency Fabs, (f) RUPA-38, (g) 15C5, and (h) LMIV230-02, coloured in orange, green, and pink, respectively.



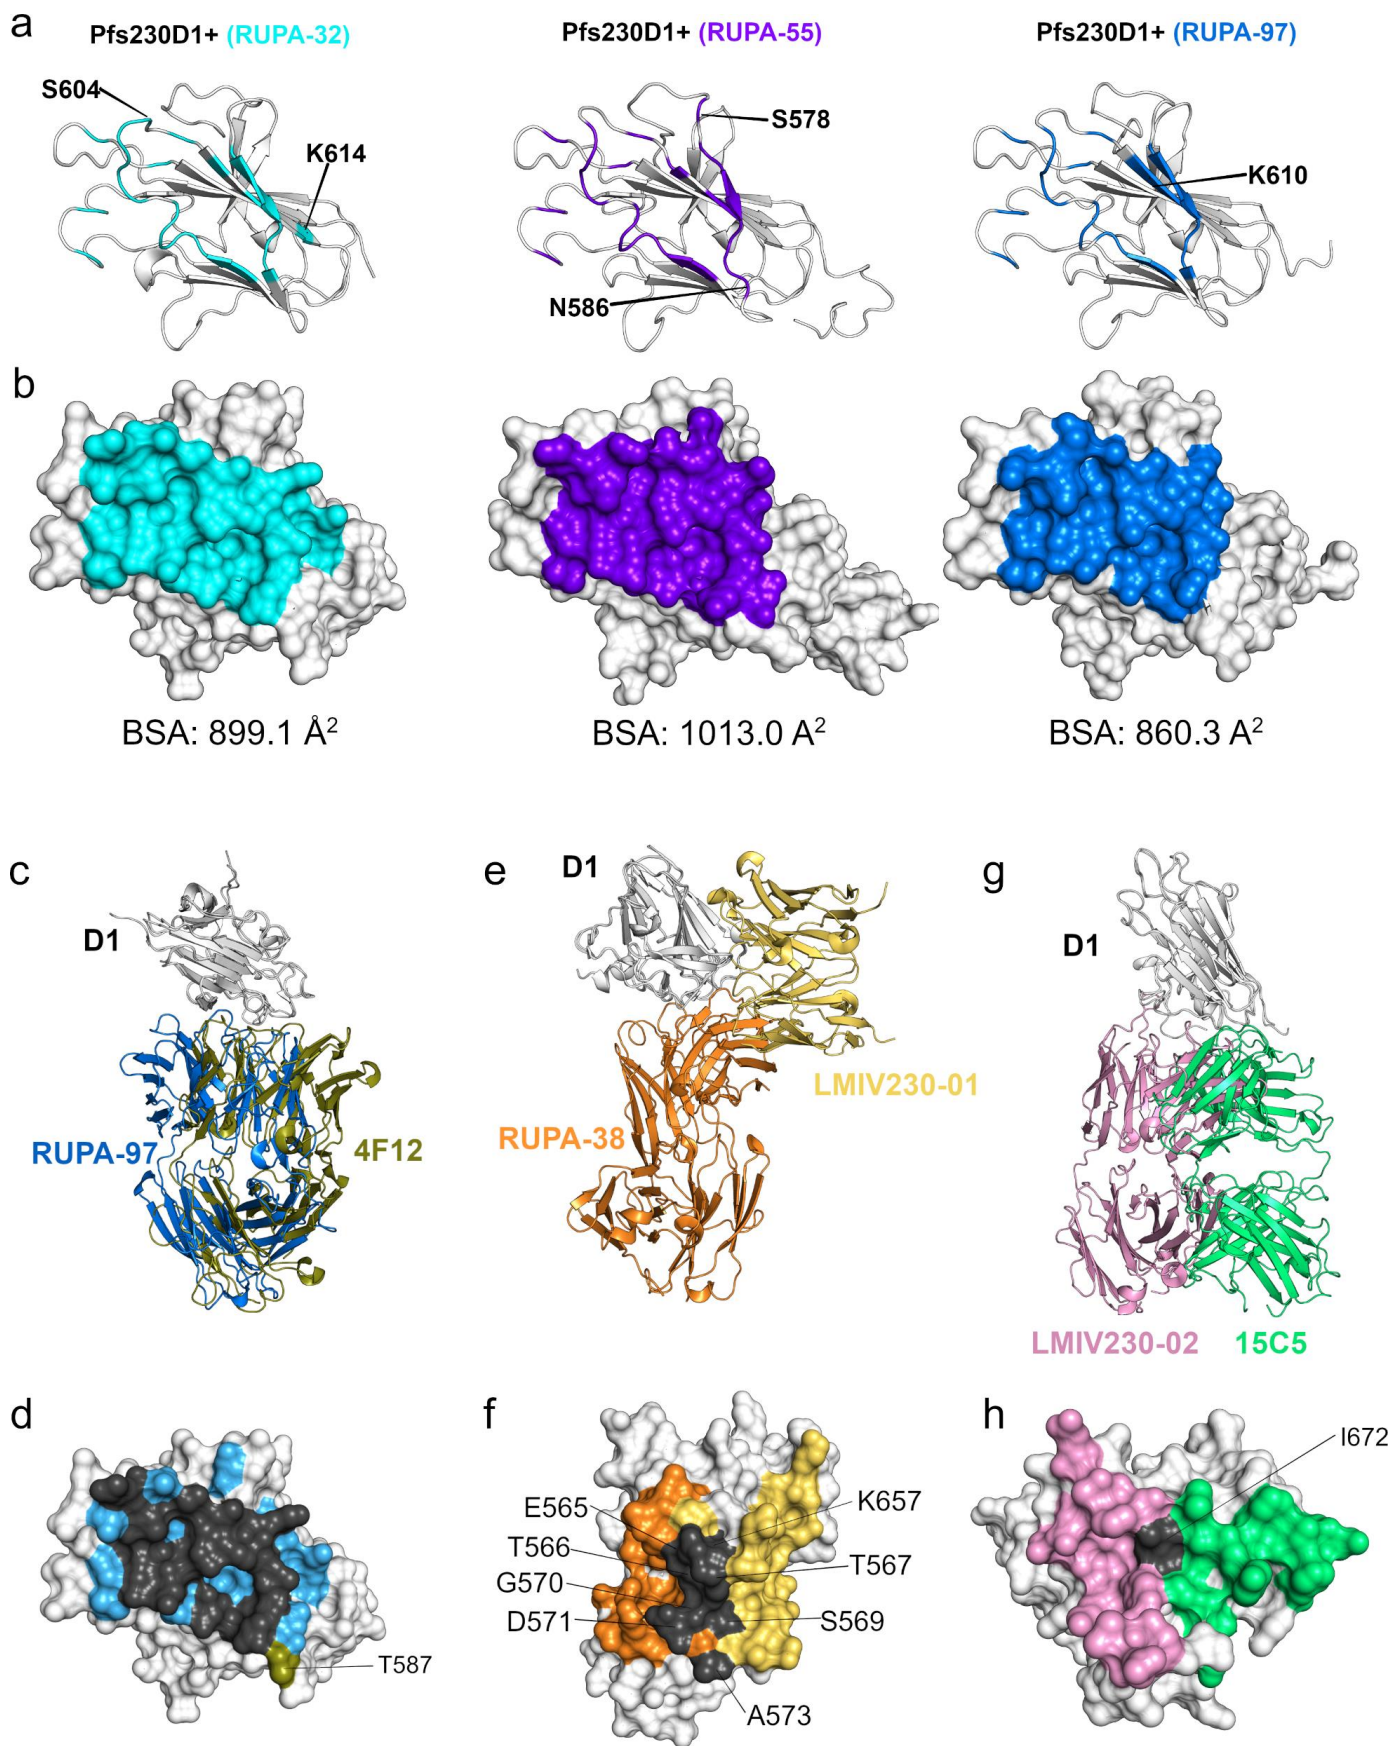

**Fig S4. Epitopes of high potency transmission-reducing mAbs and other overlapping epitopes on Pfs230 D1.** Related to **Fig 3**. The epitopes on Pfs230 D1+ of RUPA-32, -55, and -97 are coloured in cyan, purple, and blue, respectively, shown as **(a)** cartoon and **(b)** surface representations. Unique residues within each epitope are labeled. **(c)** Structural superposition on Pfs230 domain 1 of the Fab RUPA-97 structure with the structure of 4F12 (PDB ID 6OHG). **(d)** Surface representation of Pfs230 D1+ showing the epitopes of RUPA-32, -55, and -97 (light blue) and 4F12 (olive). **(e)** Structural superposition on the Pfs230 domain 1 of the RUPA-38 structure with the structure of scFv LMIV230-01 (PDB ID 7JUM). **(f)** Surface representation of Pfs230 D1+ showing the epitopes of RUPA-38 (orange) and LMIV230-01 (yellow). **(g)** Structural superposition on Pfs230 domain 1 of the Fab LMIV230-02 structure with the structure of Fab 15C5. **(h)** Surface representation of Pfs230 D1+ showing the epitopes of LMIV230-02 (pink) and 15C5 (green). All the overlapping epitopes are coloured in dark gray, and residues are labeled.

**Table S4. Co-occurring SNPs present in Pfs230 D1+ amino acids 552 - 731.** Related to **Table 1**. No SNPs within epitope bin I (A583T, T602K, E612K, V632A, K716N, and N719S) were found to co-occur with each other, while E612K, A583, and K716 (indicated in bold) co-occurred with SNPs found on other regions of D1+. Since G605S occurs with an allele frequency of 94.4%, the 5.6% of G605 alleles are reported herein.

| Co-occurring SNPs             | Freq (%) |
|-------------------------------|----------|
| K661N + D713Y                 | 1.912    |
| T652R + K661N                 | 1.814    |
| G605 + K661N                  | 0.998    |
| T656N + K661N                 | 0.689    |
| E655V + K661N                 | 0.323    |
| K661N + A699T                 | 0.056    |
| K661N + V687I                 | 0.056    |
| G605 + D713Y                  | 0.042    |
| A699T + D713Y                 | 0.014    |
| D561N + K661N                 | 0.014    |
| D637N + K661N                 | 0.014    |
| <b>E612K</b> + K661N          | 0.014    |
| E654K + K661N                 | 0.014    |
| G605 + N715K                  | 0.014    |
| K644Q + K661N                 | 0.014    |
| K661N + H697Q                 | 0.014    |
| K661N + N715K                 | 0.014    |
| K661N + T675K                 | 0.014    |
| K661N + V701M                 | 0.014    |
| K661N + Y726H                 | 0.014    |
| T652R + D713Y                 | 0.014    |
| T652R + K665Q                 | 0.014    |
| V574I + K661N                 | 0.014    |
| <hr/>                         |          |
| T652R + K661N + D713Y         | 0.351    |
| G605 + T652R + K661N          | 0.267    |
| E655V + K661N + D713Y         | 0.070    |
| T652R + T656N + K661N         | 0.070    |
| K661N + A699T + D713Y         | 0.042    |
| T652R + E655V + K661N         | 0.028    |
| T652R + K661N + A699T         | 0.028    |
| <b>A583T</b> + G605 + K661N   | 0.014    |
| E655V + K661N + A699T         | 0.014    |
| G605 + K661N + A699T          | 0.014    |
| G605 + K661N + D713Y          | 0.014    |
| K661N + D713Y + <b>K716N</b>  | 0.014    |
| K661N + T675K + D713Y         | 0.014    |
| T656N + K661N + A699T         | 0.014    |
| T656N + K661N + D713Y         | 0.014    |
| <hr/>                         |          |
| T652R + K661T + K661N + D713Y | 0.042    |
| G605 + E655V + K661N + D713Y  | 0.014    |
| G605 + T652R + K661N + D713Y  | 0.014    |
| G605 + T652R + T656N + K661N  | 0.014    |
| T652R + T656N + K661N + D713Y | 0.014    |
| T656N + K661N + A699T + D713Y | 0.014    |

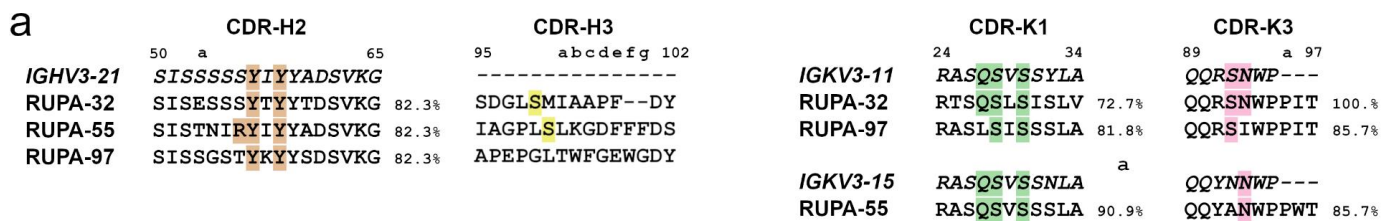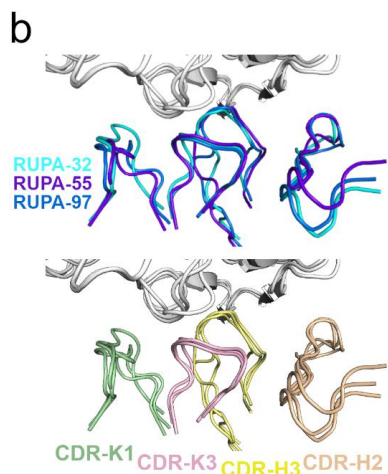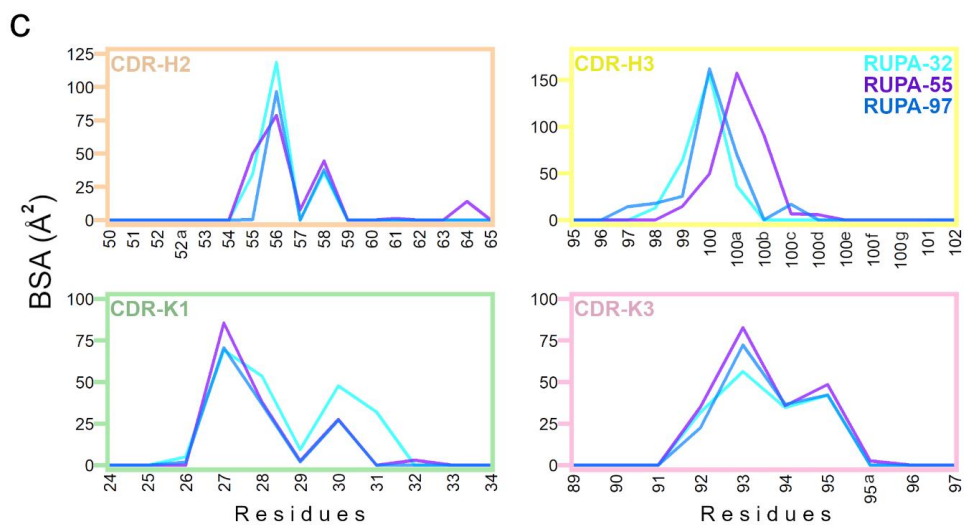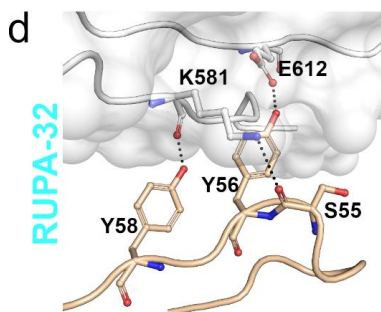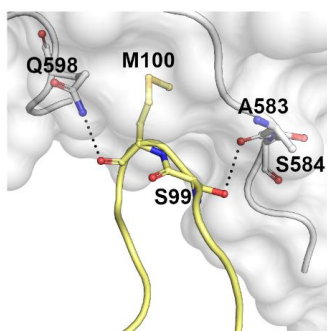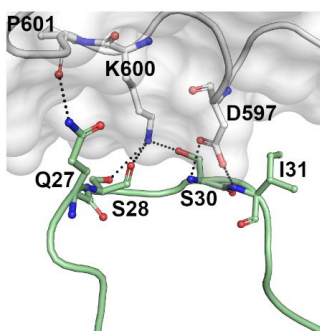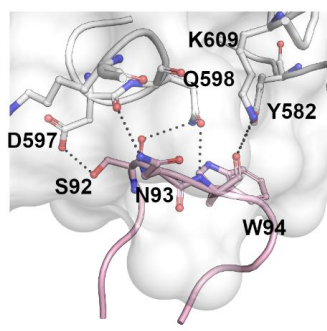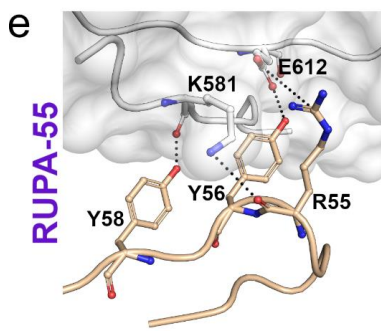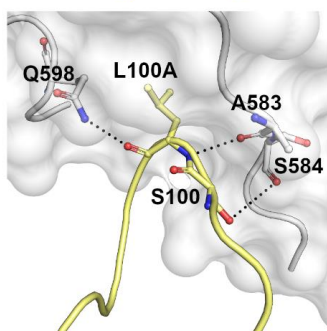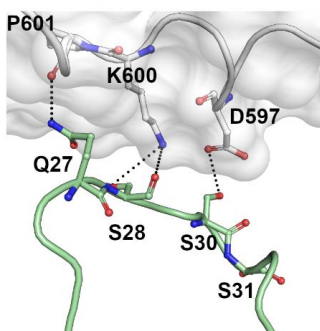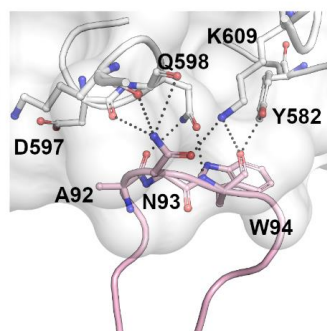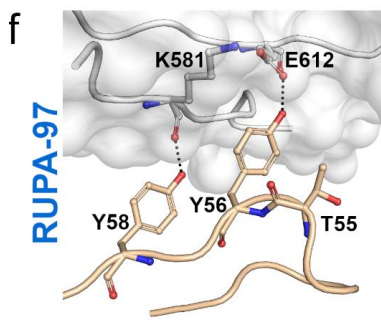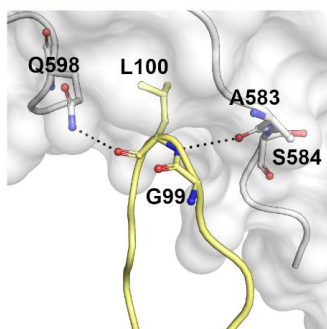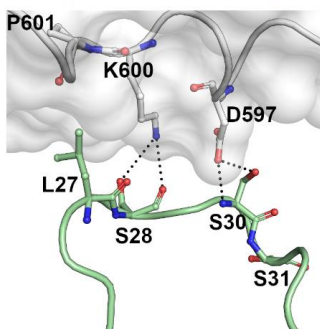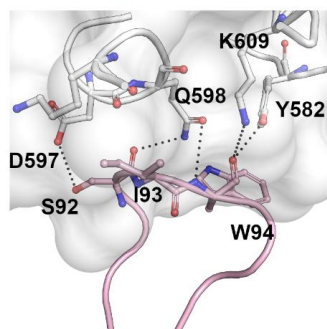

**Fig S5. Detailed interactions of high potency Pfs230 D1+ binding mAbs.** Related to **Table S3** and **Fig 3**. **(a)** Amino acid sequence alignments of antigen-interacting CDRs with the predicted germline precursor sequences. Residues forming H-bonds are highlighted in color. Kabat numbering is used. **(b)** Superposition of all antigen-interacting CDRs of RUPA-32, 55, and 97 in complex with Pfs230 D1+. **(c)** Plots of buried surface area (BSA) contributions by CDR residue. **(d-f)** Detailed interaction interfaces of CDRs K1, K3, H3, and H2 (coloured green, pink, yellow, and tan, respectively) for RUPA-32, 55, and 97. H-bonding interactions are indicated with dashed lines.

**Table S6. Hydrogen-bonding interactions between high TRA mAbs and Pfs230 D1+. Related to Fig 3. The asterisk (\*) denotes a salt bridge.**

| <b>Pfs230<br/>D1+</b> | <b>RUPA-<br/>32</b> | <b>RUPA-<br/>55</b> | <b>RUPA-<br/>97</b> |
|-----------------------|---------------------|---------------------|---------------------|
| K581                  | S55                 | R55                 |                     |
| K581                  | Y58                 | Y58                 | Y58                 |
| Y582                  | W94                 | W94                 | W94                 |
| A583                  | S99                 | L100a               | L100                |
| S584                  |                     | S100                |                     |
| D597                  | S30                 | S30                 | S30                 |
| D597                  | I31                 |                     |                     |
| D597                  | S92                 |                     | S92                 |
| D597                  | N93                 | N93                 | N93                 |
| Q598                  | S92                 | A92                 | S92                 |
| Q598                  |                     | N93                 |                     |
| Q598                  | W94                 | W94                 | W94                 |
| Q598                  | M100                |                     | L100                |
| Q598                  |                     | L100a               |                     |
| K600                  | S28                 | S28                 | S28                 |
| K600                  | S30                 |                     |                     |
| K600                  |                     | N93                 |                     |
| P601                  | Q27                 | Q27                 |                     |
| T602                  |                     | E1                  |                     |
| E603                  |                     | E1                  |                     |
| K609                  |                     | N93                 |                     |
| K609                  | W94                 | W94                 | W94                 |
| E612*                 |                     | R55*                |                     |
| E612                  | Y56                 | Y56                 | Y56                 |



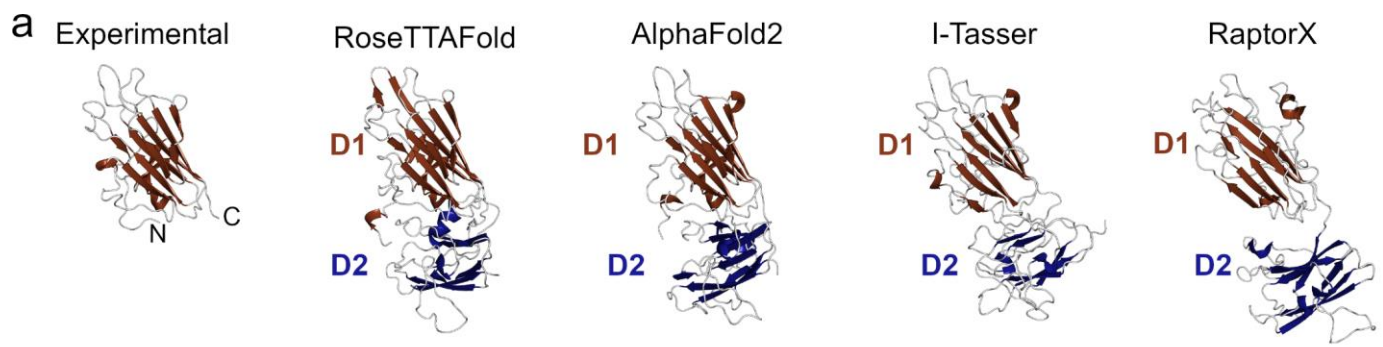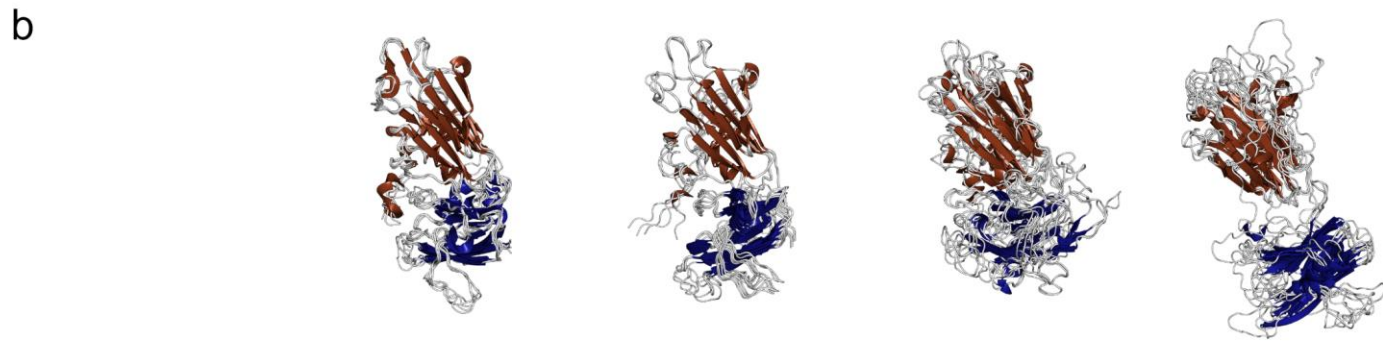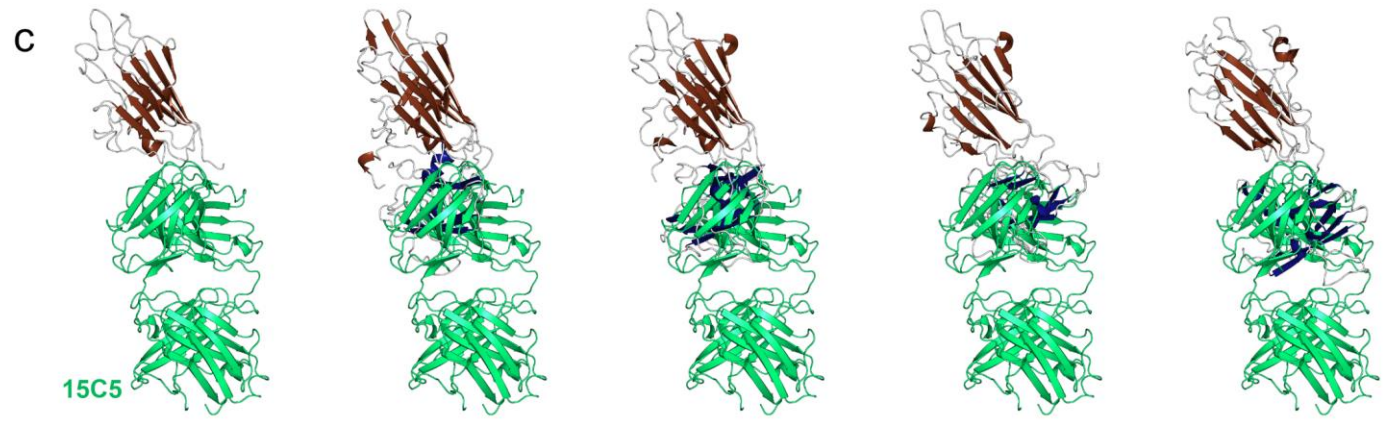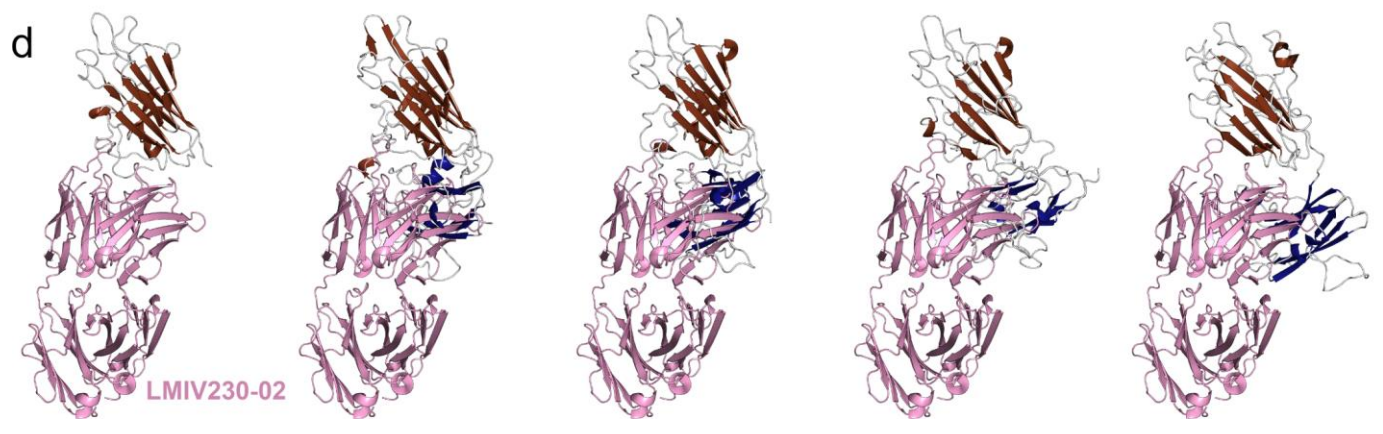

**Fig S6. Pfs230 domain 2 sterically occludes low-potency epitopes on domain 1.** Related to **Fig 4.** (a) The crystal structure of Pfs230 D1+ (from the LMIV230-02 complex) contrasted against highest ranked theoretical models of domains 1 and 2 produced by RoseTTAFold<sup>26</sup>, AlphaFold2, I-Tasser<sup>27</sup>, and RaptorX<sup>28</sup>. (b) Superposition at domain 1 of all five output models from each *in silico* modeling approach demonstrates a general convergence for the position of domain 2. Superposition of Fabs (c) 15C5 and (d) LMIV230-02 onto their respective domain 1 epitopes on the theoretical models of domains 1 and 2 show clashing, independent of which modeling software is used.
